# Supplementary material for: Fecal fungal microbiota alterations associated with clinical phenotypes in Crohn’s disease in southwest China
Source: PeerJ. 2022 Oct 18;10:e14260. doi: 10.7717/peerj.14260 (PMC9586077; doi:10.7717/peerj.14260)
Supplement: Supplemental Information 2 — Anonymised information of study population including basic information, laboratory test results, Montreal classification, extra-intestinal manifestations, complications and so on. [file peerj-10-14260-s002.xlsx]

## Sheet: raw data
			Basic information					Laboratory test results												Montreal classification				Extra-intestinal manifestations						complications（T or F）				planed medication
		sample NO.	CDAI	sex	age	onset age	past surgical history （T or F）	HCT 0.40-0.50 L/L	WBC count 3.5-9.510^9/L	Nutro 1.8-6.3 10^9/L	Lymph 1.1-3.2 10^9/L	N/L ratio	PLT count 100-300 10^9/L	lymph percen 20-50%	CRP <5mg/L	hsCRP <3.5	ESR <21mm/h	β hydroxybutyric acid 0.02-0.27mmol/L	fecal OB	Age	Location	Behaviour	Perianal lesions	Oral aphtha	Genital ulcer	Skin lesion	Arthritis/arthralgia	extra-intestinal manifestations(5 all in)	extra-intestinal manifestations （T or F）	abdominal abscess	Fistulas and/or sinus	Perianal lesion	transmural_lesions	sulfasalazine	Corticosteroids	Thiopurine or Methotrexate	anti-TNFα	others	None
CD-F	1	CD20	CD_flare	M	32	32	T	0.33	23.16	20.38	1.41	14.4539	899	6.1	70.1	none	55	0.09	1	2	L3	B2+B3	0					0	F	T	T		T			1
	2	CD14	CD_flare	M	27	16	T	0.16	6	2.38	1.59	1.49686	555	26.5	15.3	58.2	117	0.88	1	1	L2	B3	1					0	F	T	T	T	T			1
	3	CD22	CD_flare	M	29	30	T	0.46	4.44	2.55	1.46	1.74658	199	32.9	3.47	none	12	none	0	2	L3	B1	1					0	F			T					1
	4	CD19	CD_flare	M	30	30	T	0.37	4.74	3.45	0.86	4.01163	265	18.1	25.5	none	73	0.07	1	2	L3	B3	0				T	AS	T	T	T		T	1				Etanercept
	5	CD11	CD_flare	M	21	20		0.41	8.27	5.62	1.5	3.74667	383	18.1	45.4	none	52	0.05	1	2	L3	B1	1	T		T		oral ulcer、dermatitis	T		T	T	T						1
	6	CD12	CD_flare	M	29	25	T	0.35	6.4	4.56	1.02	4.47059	333	15.9	5.74	45.4	52	0.05	1	2	L3	B1	1					0	F		T	T	T				1
	7	CD17	CD_flare	M	32	31	T	0.47	8.13	4.93	2.4	2.05417	299	29.5	none	1.05	8	none	0	2	L3	B3	1					psoriasis	T		T	T	T			1
	8	CD10	CD_flare	M	18	19	T	0.46	5.05	3.31	1.24	2.66935	204	24.6	1.17	none	<2.0	0.06	0	2	L1	B1	1					0	F		T	T	T			1
	9	CD24	CD_flare	M	20	19	T	0.3	18.79	14.77	2.89	5.11073	365	15.4	55.9	none	120	0.1	1	2	L3	B3	1					0	F		T	T	T			1
	10	CD53	CD_flare	M	29	27	T	0.37	3.63	2.7	0.91	2.96703	209	25.1	4.44	none	2	0.05	0	2	L3	B3	1					0	F	T		T	T			1
	11	CD69	CD_flare	M	27	27	T	0.48	7.45	4.41	2.33	1.8927	137	31.3	4.87	none	23	0.15	1	2	L2	B1	1					0	F		T	T	T				1
	12	CD46	CD_flare	F	33	33	T	0.35	3.98	2.77	0.61	4.54098	235	15.3	10.4	none	35	0.09	0	2	L2	B3	1				T	arthritis	T		T	T	T			1
	13	CD25	CD_flare	M	25	25	T	0.31	7.43	6.27	0.6	10.45	368	24.7	8.1	none	50	0.35	1	2	L3	B3	1					0	F		T	T	T				1
	14	CD47	CD_flare	M	34	28		0.31	4.79	3.3	0.89	3.70787	222	18.6	51.2	none	53	0.03	1	2	L3	B1	0					0	F							1
	15	CD63	CD_flare	M	34	31		0.48	5.9	3.07	2.34	1.31197	231	39.7	17.3	16	23	0.07	1	2	L2	B2	0					0	F						1
	16	CD9	CD_flare	M	58	55		0.34	16.62	15.19	1.18	12.8729	384	7.1	29.9	none	63	0.1	1	3	L3	B1	0					0	F							1
	17	CD21	CD_flare	F	45	46	T	0.32	7.5	4.78	1.37	3.48905	301	18.3	28.3	none	49	0.6	1	3	L2	B1	1	T	T			oral and genital ulcer	T		T	T	T		1
	18	CD26	CD_flare	M	30	28	T	0.35	6.46	5.41	0.51	10.6078	189	7.9	102	none	78	0.08	1	2	L3	B3	1					0	F		T	T	T			1
	19	CD48	CD_flare	M	25	25	T	0.36	4.93	2.81	1.13	2.48673	311	23	31	none	18	0.45	1	2	L3	B2	0					0	F		T		T			1
	20	CD55	CD_flare	M	24	19	T	0.41	7.13	4.66	1.78	2.61798	246	25	69.4	none	52	0.42	1	2	L2	B1	1					0	F		T	T	T			1
	21	CD4	CD_flare	M	28	24	T	0.16	10.79	8.45	1.58	5.3481	95	14.6	none	25.1	2	0.88	1	2	L3	B3	1	T			T	oral ulcer,arthritis	T		T	T	T				1
	22	CD16	CD_flare	F	56	61		0.28	5.04	3.54	0.89	3.97753	206	17.7	21.6	none	49	0.29	1	3	L3	B3	0					0	F							1
	23	CD34	CD_flare	F	32	28	T	0.29	8.77	7.42	0.78	9.51282	304	8.9	18.2	none	54	0.03	0	2	L3	B2	0					0	F							1
	24	CD7	CD_flare	F	43	40	T	0.32	9.9	8.17	1.52	5.375	427	14.2	49	none	113	0.26	1	2	L3	B3	0	T				oral ulcer	T	T	T		T				1
	25	CD6	CD_flare	F	50	47	T	0.34	8.89	6.27	1.9	3.3	324	21.4	10.2	none	92	0.17	1	3	L2	B3	1					0	F	T	T	T	T						1
	26	CD59	CD_flare	M	29	30	T	0.48	12.71	9.16	2.8	3.27143	305	22	none	19.4	49	0.06	0	2	L3	B1	1					0	F			T					1
	27	CD51	CD_flare	M	70	67	T	0.39	3.91	1.96	1.63	1.20245	149	41.7	6.44	none	21	0.08	1	3	L3	B2	1					0	F			T				1
	28	CD49	CD_flare	F	30	31		0.32	6.88	5.39	0.83	6.49398	338	12.1	26.8	none	54	0.08	1	2	L3	B1	0					0	F								1
	29	CD45	CD_flare	F	43	37	T	0.3	14.01	11.15	1.58	7.05696	666	11.3	74.6	none	120	0.23	1	2	L2	B2+B3	0					0	F	T	T		T	1
	30	CD44	CD_flare	M	20	18	T	0.39	6.77	3.53	2.15	1.64186	298	31.8	8.85	none	45	0.05	1	2	L3	B3	0					0	F	T	T		T		1
	31	CD39	CD_flare	M	29	25	T	0.41	7.74	5.69	1.33	4.2782	285	17.2	7.69	none	34	0.12	1	2	L3	B1	1					0	F		T	T	T				1
	32	CD64	CD_flare	M	34	33	T	0.36	10.62	8.68	1.03	8.42718	252	9.7	42.1	none	54	0.04	1	2	L3	B3	0	T	T			oral and genital ulcer	T	T	T		T			1
	33	CD71	CD_flare	F	31	29		0.39	4.39	2.5	1.56	1.60256	249	35.5	3.99	none	46	0.13	1	2	L3	B3	1					0	F			T		1
	34	CD70	CD_flare	M	21	20		0.45	10.98	7.05	3.02	2.33444	310	27.5	14.9	none	46	0.08	1	2	L3	B1	0					0	F										1
CD-R	1	CD1	CD_remission	M	46	46		0.37	5.28	3.06	1.71	1.78947	152	32.4	15.5	none	6	0.05	none	3	L2	B1	0					0	F										1
	2	CD3	CD_remission	M	17	17	T	0.35	11.87	9.04	1.59	5.68553	490	13.4	none	76.5	120	0.1	1	2	L3	B2	0					0	F								1
	3	CD15	CD_remission	M	20	20		0.41	3.26	2.15	0.72	2.98611	230	22	none	1.55	19	0.04	1	2	L2	B1	0					0	F										1
	4	CD43	CD_remission	M	21	21		0.44	5.17	2.98	1.82	1.63736	132	35.2	20.9	24.9	34	none	none	2	L3	B1	0					0	F										1
	5	CD32	CD_remission	M	21	19	T	0.44	5.17	2.9	1.8	1.61111	275	34.8	<1.00	none	19	0.11	0	2	L3	B2	1					0	F			T					1
	6	CD35	CD_remission	M	26	25	T	0.35	7.23	4.94	1.9	2.6	158	26.3	15.8	none	52	0.15	1	2	L2	B1	1					0	F			T					1
	7	CD66	CD_remission	M	32	27	T	0.46	5.51	3.21	1.87	1.71658	180	33.9	1.77	none	11	0.12	0	2	L3	B1	1	T				oral ulcer	T		T	T	T				1
	8	CD41	CD_remission	M	44	43	T	0.39	6.59	3.79	2.37	1.59916	299	36	10.4	none	120	0.06	1	3	L3	B3	1					0	F		T	T	T				1
	9	CD61	CD_remission	M	18	16		0.41	10.9	7.82	1.85	4.22703	316	17	none	40.5	41	0.19	0	1	L1	B1	1					0	F			T		1
	10	CD65	CD_remission	M	30	30	T	0.39	2.52	1.74	0.63	2.7619	145	25	1.99	none	13	0.2	0	2	L3	B2	0					0	F								1
	11	CD72	CD_remission	M	48	48		0.47	4.92	3.11	1.46	2.13014	168	29.7	1.76	none	9	none	0	3	L3	B1	0					0	F							1	1
HC	1	HS2		M	23
	2	HS1		F	22
	3	HS4		F	26
	4	HS5		F	23
	5	HS17		M	23
	6	HS18		M	30
	7	HS8		M	22
	8	HS14		F	31
	9	HS9		F	25
	10	HS10		F	48
	11	HS7		M	55
	12	HS12		M	16
	13	HS6		F	24
	14	HS15		F	23
	15	HS13		M	24
	16	HS16		F	30
	17	HS11		M	25
